# Supplementary material for: Inhibition of the metalloprotease ADAM19 as a novel senomorphic strategy to ameliorate gut permeability and senescence markers by modulating senescence-associated secretory phenotype (SASP)
Source: publisher site journal article supplement (doi:10.18632/aging.206224), 2025-03-20
Supplement: Supplementary file [file aging-v17i3-206224-supplementary-material-SD1.pdf]

SUPPLEMENTARY FIGURES

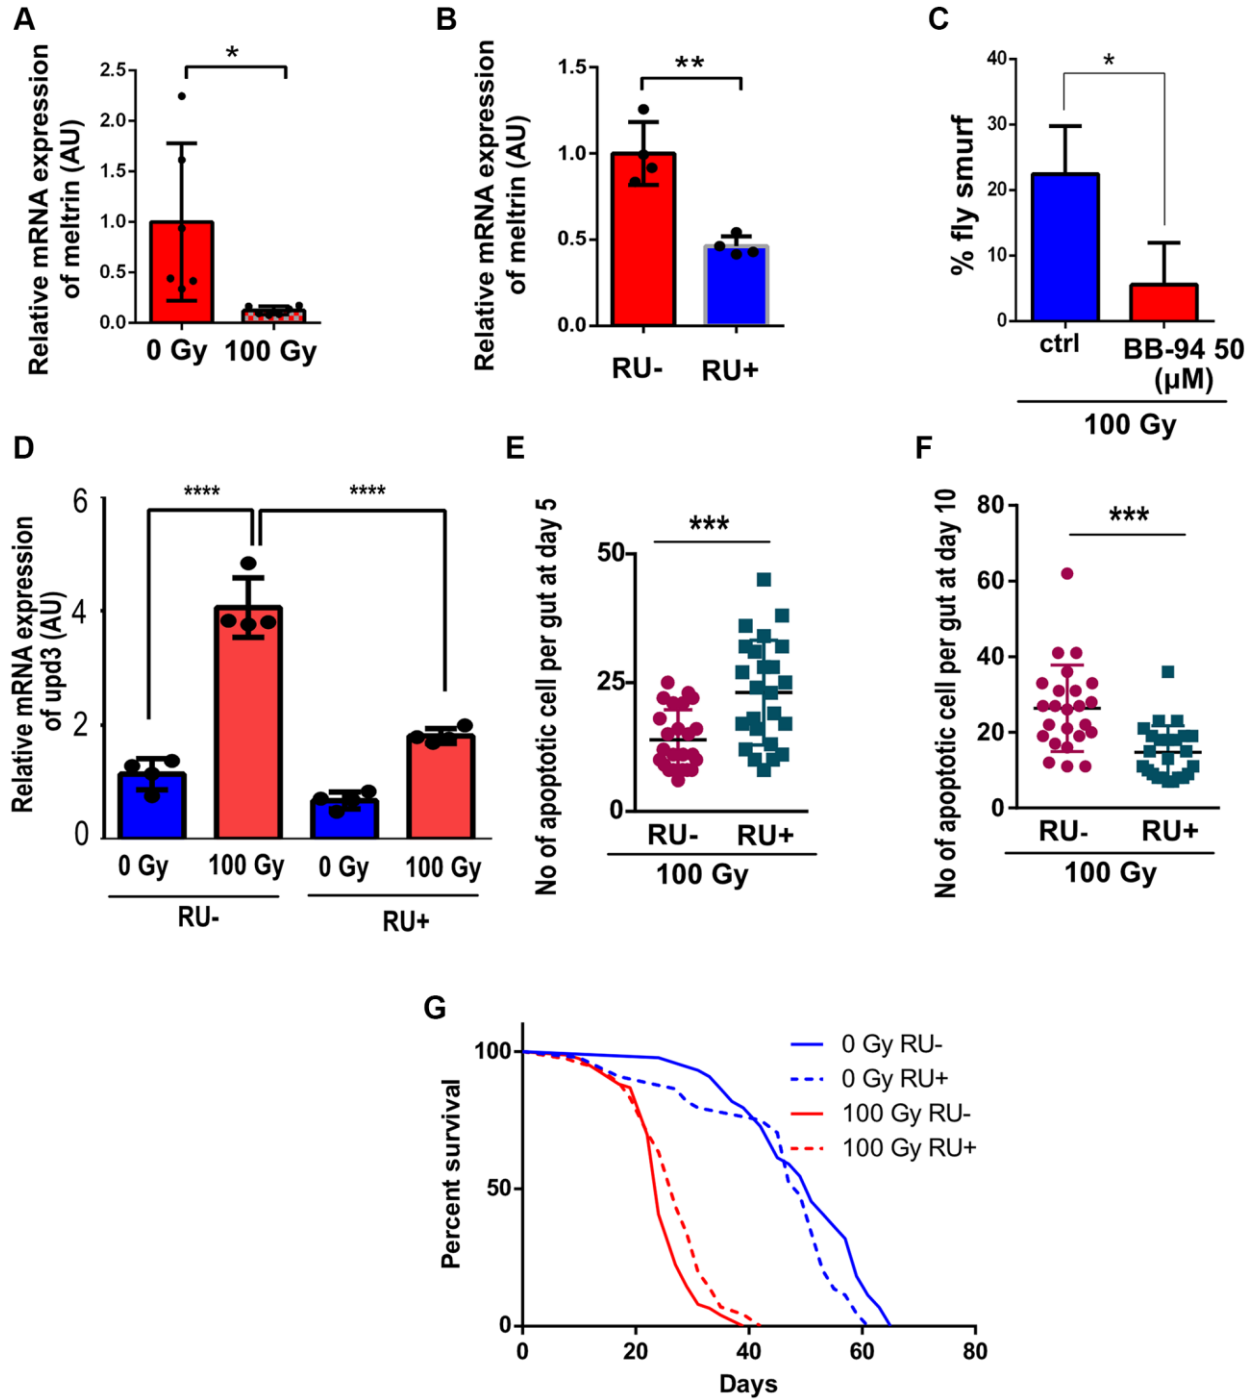

**Supplementary Figure 1.** (A) Relative mRNA expression of *meltrin* detected by qRT-PCR in flies upon X-Ray irradiation. (B) Relative mRNA expression of *meltrin* detected by qRT-PCR in the gut of *meltrin* RNAi flies. (C) % of Smurf-positive flies with leaky gut upon 50 μM BB-94 treatment after 100 Gy X-Ray exposure. (D) Relative mRNA expression of *upd3* detected by qRT-PCR upon X-Ray irradiation and *meltrin* knockdown. (E) Quantification of apoptotic cells upon *meltrin* knockdown and 5-day post-X-ray irradiation. (F) Quantification of apoptotic cells upon *meltrin* knockdown and 10-day post-X-ray irradiation. (G) The lifespan of *Drosophila* in flies with X-ray exposure (100 Gy), No X-ray exposure (0 Gy), *meltrin* knockdown (RU+) in ECs, and no *meltrin* knockdown control (RU-). Error bars indicate SEM. The student's *t*-test determined the significance level by asterisks: \**p* < 0.05, \*\**p* < 0.01, \*\*\**p* < 0.001, and \*\*\*\**p* < 0.0001.

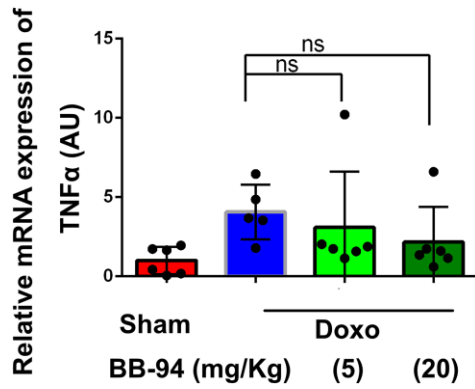

**Supplementary Figure 2. Relative mRNA expression of TNFα in mouse colon tissues.** Error bars indicate SEM. The significance level was determined by ANOVA and denoted by ns (no significance).

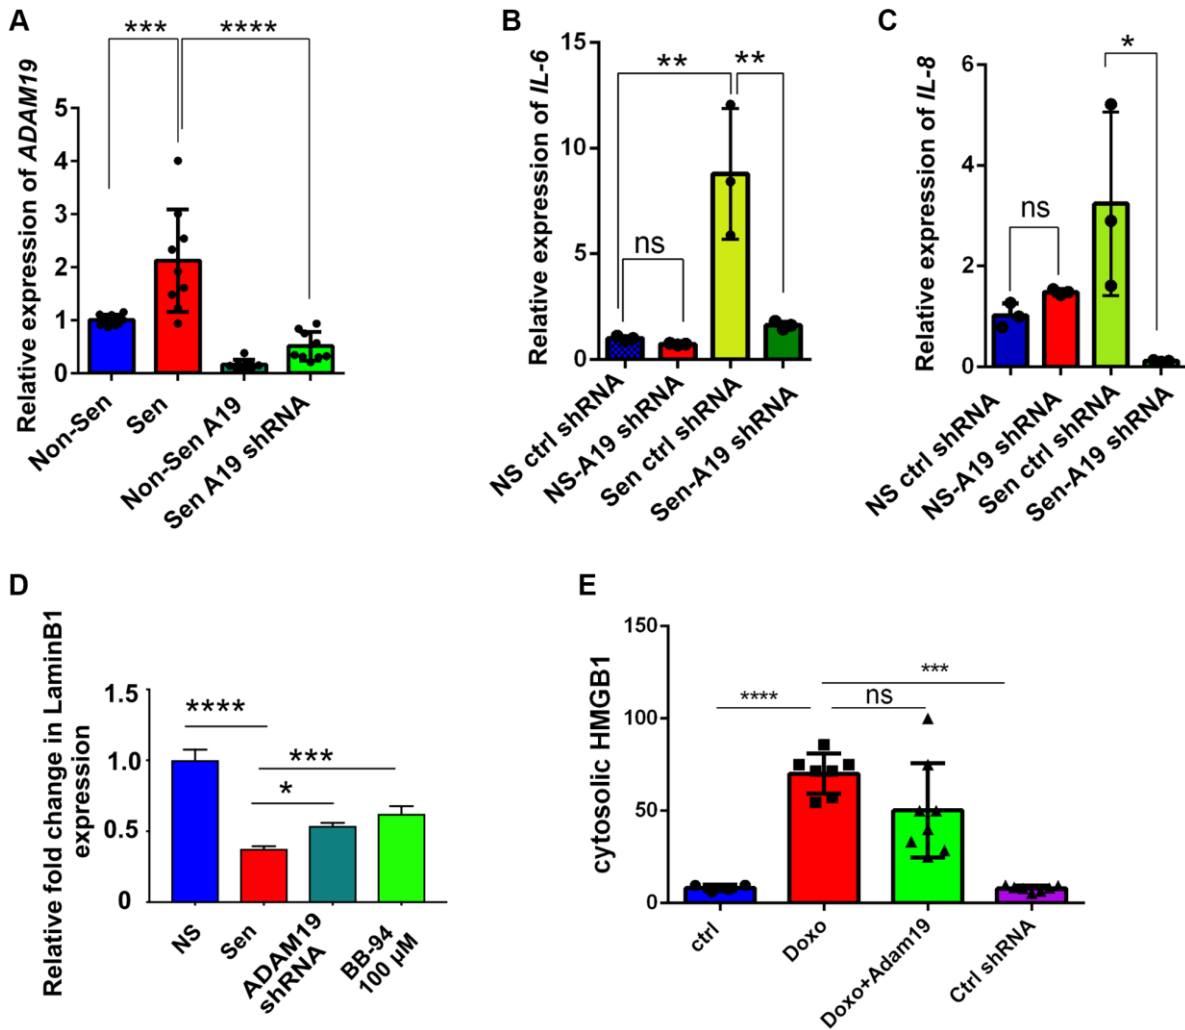

**Supplementary Figure 3. (A)** ADAM19 expression upon senescence and non-senescence with ADAM 19 or shRNA control treatments. **(B)** Relative mRNA expression of IL-6 in IMR90 cells upon senescence and non-senescence with ctrl shRNA and ADAM19 shRNA transduction. **(C)** Relative mRNA expression of IL-8 in IMR90 cells upon senescence and non-senescence with ctrl shRNA and ADAM19 shRNA transduction. **(D)** Lamin B expression in control, senescence, senescence with ADAM19 shRNA expressing and with BB-94 treatment cells. **(E)** % cells count with cytosolic HMGB1 in control, senescence, and senescence with ADAM19 shRNA expressing cells. Error bars indicate SEM. The significance level was determined by ANOVA and denoted by asterisks: \* $p < 0.05$ , \*\* $p < 0.01$ , \*\*\* $p < 0.001$ , and \*\*\*\* $p < 0.0001$ . In (A–D) “NS” represent non senescence and ‘Sen’ represent senescence.
